# Supplementary material
Source: Elsevier journal article supplement (https://www.sciencedirect.com/science/article/pii/S030089322600076X)

## ANEXO. MATERIAL ADICIONAL

**Figura 1S.** Medición del área del centímetro superior del *septum* interventricular en una vista paraesternal. Fuente: Datos del estudio.

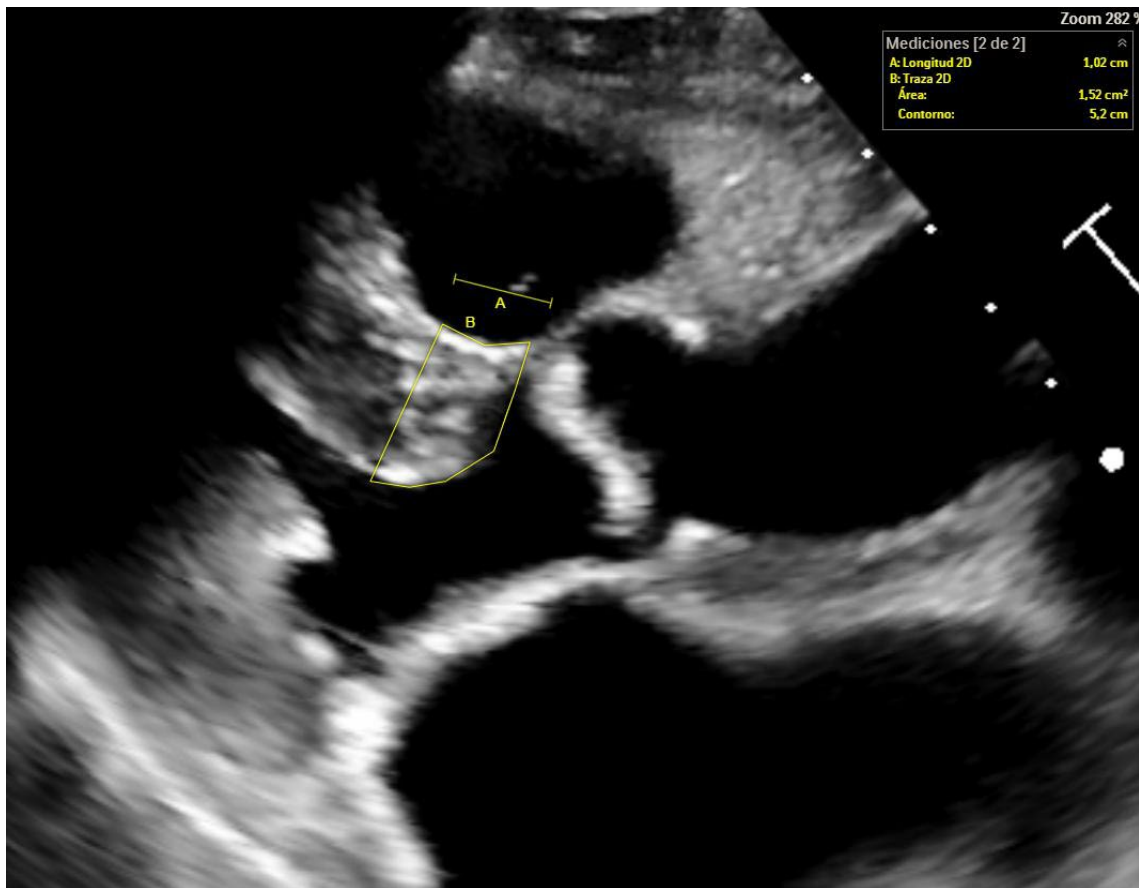

**Figura 2S.** Variabilidad de la forma del tracto de salida del ventrículo izquierdo (TSVI) en 9 sujetos. Los 2 casos de la izquierda de la primera fila presentaron calcio en el TSVI, por lo que se excluyeron.

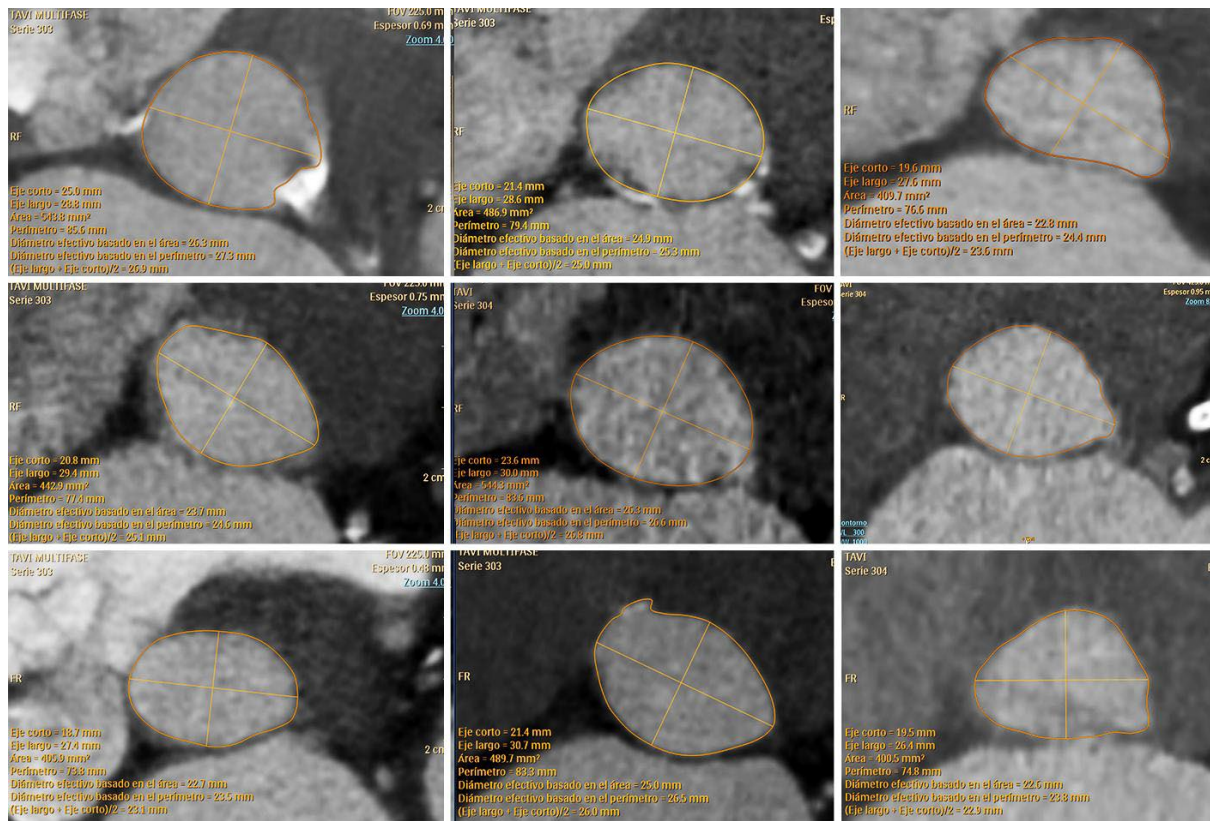

Supplement: mmc1 [file mmc1.pdf]
